# Supplementary material for: Stability Assessment in Aqueous and Organic Solvents of Metal–Organic Framework PCN 333 Nanoparticles through a Combination of Physicochemical Characterization and Computational Simulations
Source: PubMed Central journal article supplement (PMC11500399; doi:10.1021/acs.langmuir.4c01684), 2024-10-12
Supplement: la4c01684_si_001.pdf [file la4c01684_si_001.pdf]

## Supporting Information

### Stability assessment in aqueous and organic solvents of metal-organic framework PCN 333 nanoparticles through a combination of physicochemical characterization and computational simulations

Xiaoli Liu<sup>†§</sup>, Andres Ortega-Guerrero<sup>||</sup>, Nancy P. Domingues<sup>‡</sup>, Miriam Jasmin Pougin<sup>‡</sup>, Berend Smit<sup>‡</sup>, Leticia Hosta-Rigau<sup>†</sup>, Chris Oostenbrink<sup>#\*</sup>

<sup>†</sup> DTU Health Tech, Center for Nanomedicine and Theranostics, Technical University of Denmark, Nils Koppels Allé, Building423, Kgs. Lyngby 2800, Denmark

<sup>§</sup> Department of Pharmacy, Shanghai University of Medicine and Health Sciences, Zhouzhu Hwy 279, Shanghai 201318, China

<sup>||</sup> Nanotech@surfaces Laboratory, Empa - Swiss Federal Laboratories for Materials Science and Technology, Dübendorf 8600, Switzerland

<sup>‡</sup> Laboratory of Molecular Simulation (LSMO), Institut des Sciences et Ingénierie Chimiques, Valais (ISIC), École Polytechnique Fédérale de Lausanne (EPFL), Sion 1950, Switzerland

<sup>#</sup> Institute for Molecular Modeling and Simulation, Department of Material Sciences and Process Engineering, University of Natural Resources and Life Sciences, Vienna, Vienna 1190, Austria

*\*Email: [chris.oostenbrink@boku.ac.at](mailto:chris.oostenbrink@boku.ac.at)*

#### KEYWORDS

metal-organic frameworks (MOF), stability, aqueous environment, molecular dynamics simulation, umbrella sampling

## Method

Preparation of PCN-333(Al) and PCN-333 (Fe):

As previously reported,<sup>1</sup> 10 mL DMF solution of  $\text{AlCl}_3 \cdot 6\text{H}_2\text{O}$  ( $1.5 \text{ mg mL}^{-1}$ ), 5 mL DMF solution of  $\text{H}_3\text{TATB}$  ( $1 \text{ mg mL}^{-1}$ ), 15 mL DMF and 50  $\mu\text{L}$  TFA was mixed and heated at 95 °C for 24 h. nPCN-333 (Al) was collected by centrifugation.

10 mL DMF solution of  $\text{FeCl}_3$  ( $1.5 \text{ mg mL}^{-1}$ ), 5 mL DMF solution of  $\text{H}_3\text{TATB}$  ( $1 \text{ mg mL}^{-1}$ ), 15 mL DMF and 50  $\mu\text{L}$  TFA was mixed and heated at 120 °C for 24 h. nPCN-333 (Fe) was collected by centrifugation.

## Result

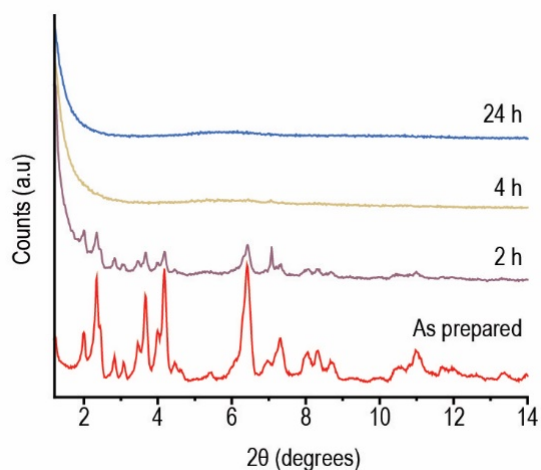

Figure S1 The change of the XRD patterns of nanosized-PCN-333 (Al) while soaking in water over time.

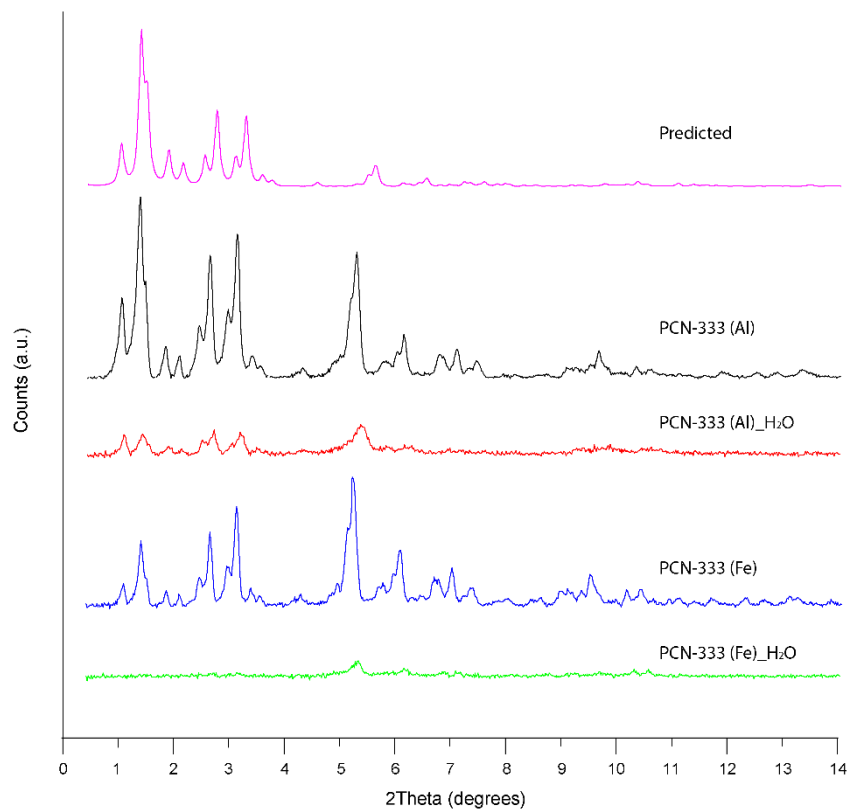

Figure S2 The XRD patterns of PCN-333(Al) and PCN-333 (Fe) particles before and after soaking in H<sub>2</sub>O for 4h.

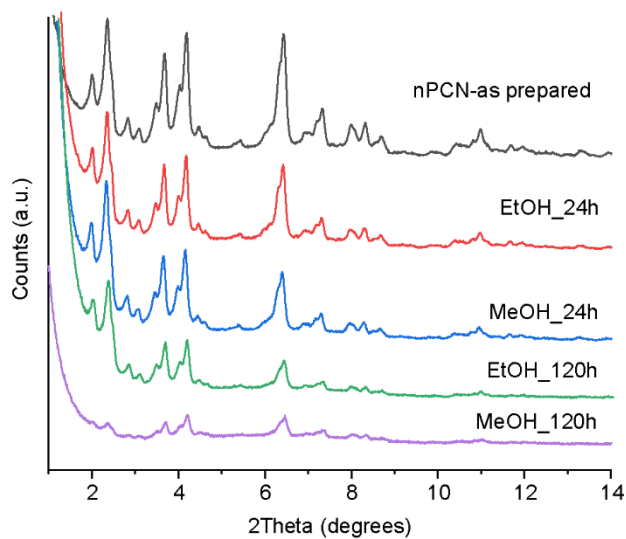

Figure S3 The XRD patterns of nPCN soaking in EtOH and MeOH at 60 °C for 24h and 120h.

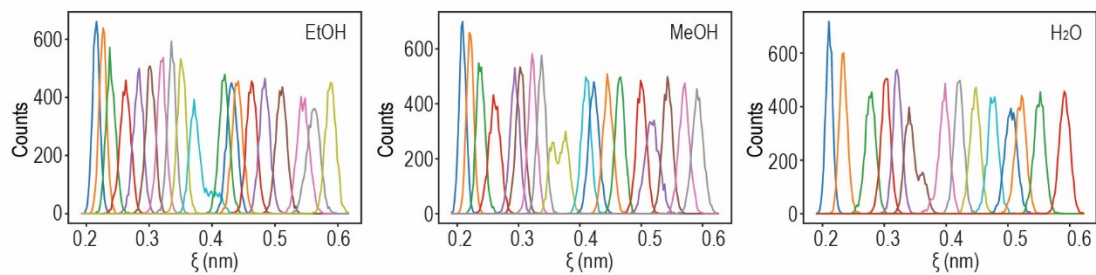

Figure S4 The histograms for each umbrella sampling simulation.

## Reference

- (1) Lian, X.; Erazo-Oliveras, A.; Pellois, J. P.; Zhou, H. C. High Efficiency and Long-Term Intracellular Activity of an Enzymatic Nanofactory Based on Metal-Organic Frameworks. *Nat Commun* 2017, 8 (1) 6969-6973. <https://doi.org/10.1038/s41467-017-02103-0>.
